# Supplementary material for: Myt1 overexpression mediates resistance to cell cycle and DNA damage checkpoint kinase inhibitors
Source: Frontiers journal article supplement (doi:10.3389/fcell.2023.1270542), 2023-11-02
Supplement: Table_1.DOCX [file Table_1.DOCX]

Table 1: **Myt1 overexpression promotes resistance to DNA damage and cell cycle checkpoint kinase inhibitors**. The table provides the IC50 values towards different cell cycle or DNA damage checkpoint kinase inhibitors calculated over 48 hours either in the presence or absence of tetracycline. The percent cell survival was evaluated using crystal violet assay and the IC50 provided is in nM with a corresponding 95%CI. The experiment was repeated three times.

| **Treatment** | **IC50 post 48 h in nM (95%CI)** | |
| --- | --- | --- |
| **Tet-** | **Tet+** |
| **Adavosertib** | 120 (114 to 124) | 308 (231 to 419) |
| **PD166285** | 48 (40 to 58) | 147 (107 to 202) |
| **AZ6738** | 846 (766 to 931) | 1467 (1305 to 1651) |
| **UCN-01** | 1000 (848 to 1177) | 2320 (1956 to 2776) |
